# 1 **PhD and postdoc training outcomes at EMBL: changing career paths for life scientists in** 2 **Europe.**

3 Junyan Lu<sup>1,‡</sup>, Britta Velten<sup>1,\*,\*§</sup>, Bernd Klaus<sup>1,\*,\*|</sup>, Mauricio Ramm<sup>2,¶</sup>, Wolfgang Huber<sup>1</sup>, Rachel  
4 Coulthard-Graf<sup>2#</sup>

5  
6  
7 <sup>1</sup> Genome Biology Unit, European Molecular Biological Laboratory, Heidelberg, Germany

8 <sup>2</sup> EMBL International Centre for Advanced Training, European Molecular Biology Laboratory, Heidelberg, Germany

9  
10 \* These authors corresponded equally

11 # Corresponding author. Email: [rachel.coulthard@embl.de](mailto:rachel.coulthard@embl.de)

12  
13 ‡ Present affiliation: Medical Faculty, Heidelberg University, Germany

14 § Present affiliation: Division of Computational Genomics and Systems Genetics, German Cancer Research Center (DKFZ),  
15 Heidelberg, Germany

16 <sup>|</sup> Present affiliation: Häfele SE & Co KG, Adolf-Häfele-Str. 1, 72202 Nagold, Germany

17 <sup>¶</sup> Present affiliation: Institute of Biomedicine, University of Turku, Finland

## 18 **Abstract**

19  
20 The life sciences are training growing numbers of PhDs and postdocs, who increasingly engage in  
21 collaborative research. The impact of these changes on the careers of researchers is, however,  
22 unclear. Here, we report an analysis of the training outcomes for 2284 researchers who completed a  
23 PhD or postdoc at the European Molecular Biology Laboratory (EMBL) between 1997 and 2020.  
24 This is the first such study published from a European institute and first time-resolved analysis  
25 globally. The most common career outcomes were in academic research, service and teaching (1263  
26 alumni, 55%), including 636 principal investigators (PIs). A broad spectrum of other career paths  
27 was also represented, including in industry research (332, 15%) and science-related professions  
28 (349, 15%). Our analysis indicates that, although there is increased competition for PI roles, life  
29 scientists continue to enter and excel in careers that drive research and innovation.

## 30 **Introduction**

31  
32 The career landscape in the life sciences has changed dramatically in the last decades for PhD  
33 students and postdocs (collectively referred to in this study as early career researchers (ECRs)). For  
34 example, in the US, the percentage of life science doctoral graduates holding a tenure track position  
35 3 to 5 years after graduation more than halved from 18.1% to 8.1% between 1997 and 2015 (1). The  
36 principal cause appears to be that the numbers of PhD students and postdocs trained have increased  
37 relative to the number of faculty positions (2-6). This trend may stem from economic constraints US  
38 institutions faced due to the plateauing of the NIH budget in 2003 after a period of budget increases  
39 (7, 8). In Europe, the number of doctorates awarded has also increased faster than number of  
40 academic staff, with doctorates increasing by 44% from 82 416 in 2004 to 118 375 in 2012 (9),  
41 compared to an increase of only about 9% for full-time equivalent academic staff in the tertiary  
42 education sector (10). Economic factors include the stagnation in growth in private, philanthropic  
43 and public funding of research and university teaching following the 2008 financial crash (11, 12).  
44 Additionally, in both the US and Europe, an increased proportion of funding is now allocated by  
45 project-based competitions rather than institutional funding (13-15).

46  
47 Nevertheless, despite low percentages obtaining these positions, majorities of graduate students  
48 starting PhDs have reported aiming for an academic career, with research-intensive principal  
49 investigator (PI) roles particularly sought after (16-20). Several surveys have reported high levels of  
50 concern from ECRs around career progression, with some linking this to high rates of mental health  
51 problems within academia (21-28). Clarity around outcomes is important to help address these  
52 concerns and ensure that ECRs can make informed decisions about their career development. Data  
53 on training outcomes are also essential for policymakers planning funding and training programs that  
54 meet the needs of science, scientists and society as a whole.

1 In response to calls for increased transparency (29, 30) some North American institutions have  
2 published analysis of PhD or postdoc career outcomes (31-33). Via the Coalition for Next  
3 Generation Life Science, many additional institutions have also committed to releasing career  
4 destinations data and other training outcomes, for example, completion rate and time to degree for  
5 PhD students (34). Similarly, in Europe, many universities collect limited information on the initial  
6 or current sector of employment (35); a small number of reports have also been released by funders  
7 or national agencies, some with analysis of trends in broad sectors of employment (36-38). These  
8 reports represent an important step towards transparency, but no detailed time-resolved analysis has  
9 yet been published from a university or research institute.

10  
11 In addition to a changing job market, other changes in research culture may also impact the training  
12 of ECRs. For example, there has been an increase in international, interdisciplinary and team-based  
13 science (39), with more authors per paper and greater amounts of data included in individual  
14 publications (40, 41).

15  
16 To investigate the effect of these trends on life science training outcomes in Europe, we performed a  
17 time-resolved analysis of the career paths of 2284 ECRs who completed a PhD or postdoc at the  
18 European Molecular Biology Laboratory (EMBL) between 1997 and 2020. EMBL is an  
19 intergovernmental life science research organisation with six sites in Europe. The organisation's  
20 missions include scientific training, basic research in the life sciences, and developing and offering a  
21 wide range of scientific services; it currently employs more than 1110 scientists in research and  
22 service teams - including over 200 PhD students and 250 postdoctoral fellows focussed on research.  
23 EMBL has a long history of training PhD students and postdocs, and was one of the first life science  
24 institutes in continental Europe with a structured PhD programme. Fellows in the EMBL  
25 International PhD programme have a completion rate of 92% and submit their PhD thesis after 3.95  
26 years on average (data for 2015-2019). More recently, EMBL has launched dedicated fellowship  
27 programmes with structured training curricula for postdocs.

28  
29 This study is, to our knowledge, the first analysis of training outcomes data published by a European  
30 research institute. Furthermore, our time-resolved data analysis enables a better understanding of  
31 how career outcomes have been changing with time, and how this may extrapolate to the future job  
32 market for current ECRs. Finally, our study also links career outcomes to other data, including  
33 publication record, to better understand training outcomes.

## 34 35 36 **Results**

37 Data collection on career and publication outcomes was initially carried out in 2017 and updated in  
38 2021.

39  
40 Using manual Google searches, we located publicly available information identifying the current  
41 role of 89% (2035/2284) of the ECRs in the study (Figure 1A). These alumni were predominantly  
42 based in the European Union (60%, 1224/2035), other European countries including UK and  
43 Switzerland (20%), and the US (11%). For 71% of alumni (1626/2284), we were able to reconstruct  
44 a detailed career path based on online CVs and biographies.

45  
46 On average, ECRs published 4.5 publications from their EMBL work, with 1.6 of those being first  
47 author research articles (Supplementary Table 1). Overall, 90% of ECRs (2047/2284) authored at  
48 least one publication from their EMBL work, and 73% (1666/2284) published at least one first  
49 author research article.

## 50 51 **EMBL alumni contribute to research & innovation in academic and non-academic roles**

52 The majority of alumni (55%) were found to be working in academic research, scientific services  
53 and teaching in 2021 (Table 1). An appreciable number of alumni were found employed in industry

1 research (15%) and in science-related roles (15%) not directly carrying out or supervising research,  
 2 but still closely linked to research, innovation or science education - for example, science  
 3 communication and patent law. Only 4% were found in professions not closely linked to science. A  
 4 more detailed summary of the types of role, aligned to a published taxonomy (42), is provided in  
 5 Supplementary Tables 2-3.

6  
 7

| Current role                                          | Role at EMBL |             |              |
|-------------------------------------------------------|--------------|-------------|--------------|
|                                                       | PhD student  | Postdoc     | Total        |
| Academic research, scientific services & teaching     | 485 (50.1%)  | 778 (59.2%) | 1263 (55.3%) |
| of which principal Investigator (AcPI)                | 215 (22.2%)  | 421 (32.0%) | 636 (27.8%)  |
| of which other research/service/teaching staff (AcOt) | 102 (10.5%)  | 281 (21.4%) | 383 (16.8%)  |
| of which postdocs (AcPD)                              | 168 (17.3%)  | 76 (5.8%)   | 244 (10.7%)  |
| Industry Research (IndR)                              | 153 (15.8%)  | 179 (13.6%) | 332 (14.5%)  |
| Science-related non-research professions (NonRes)     | 178 (18.4%)  | 171 (13.0%) | 349 (15.3%)  |
| Non-science-related professions (NonSci)              | 47 (4.9%)    | 44 (3.3%)   | 91 (4.0%)    |
| Unknown                                               | 106 (10.9%)  | 143 (10.9%) | 249 (10.9%)  |
| <b>Total</b>                                          | <b>969</b>   | <b>1315</b> | <b>2284</b>  |

8 **Table 1: Overview the current role in 2021 for PhD and postdoc alumni**

9

10 Within academia, 50% of alumni were working as PIs (Table 1), with others working in a variety of  
 11 roles, including at least 50 alumni in leadership roles within technology platforms and core facilities.  
 12 The wide variation in job titles between individual companies, sectors and countries impedes the  
 13 assessment of career progression outside academia. Nevertheless, over 59% of alumni working  
 14 outside of academic research/service/teaching had a current job title including terminology  
 15 indicative of a management-level role (manager, leader, senior, head, principal, director, president or  
 16 chief) (453/766). For leavers from the last five years (2016-2020), this number was 45% (78/174),  
 17 suggesting that a large proportion of alumni changing sectors enter - or are quickly promoted to -  
 18 managerial positions.

19

20 Within academia, most PI careers follow a linear path: PhD-Postdoc(s)-PI. 95.9% of PIs entered  
 21 their first PI role from a postdoc (75.3%) or academic research / service / teaching staff role (20.6%),  
 22 and 93.1% of PIs remained in this type of role (Supplementary Figure 1A, alumni with a detailed  
 23 career path only). The career paths of those in non-PI roles were less linear. Entry routes for EMBL  
 24 alumni into industry research positions were, for example, more varied: 20.2% entered their first  
 25 industry role directly from their PhD, 56.4% from a postdoc position and 13.3% from other non-PI  
 26 academic positions (Supplementary Figure 1C). Additionally, only 71.6% of those who entered a  
 27 research position in industry remained in this type of role long-term; 9.9% returned to academia and  
 28 18.6% transitioned to non-research or non-science-related professions.

29

### 30 **Gender differences in career outcomes**

31 Many studies have reported that female ECRs are less likely to remain in an academic career, (43,  
 32 44). Consistent with these previous studies, we observed differences in PI career outcome by gender  
 33 for both PhD and postdoc alumni. Female alumni were found less frequently in PI roles and more  
 34 frequently in non-research science-related positions than their male colleagues (Figure 1B).

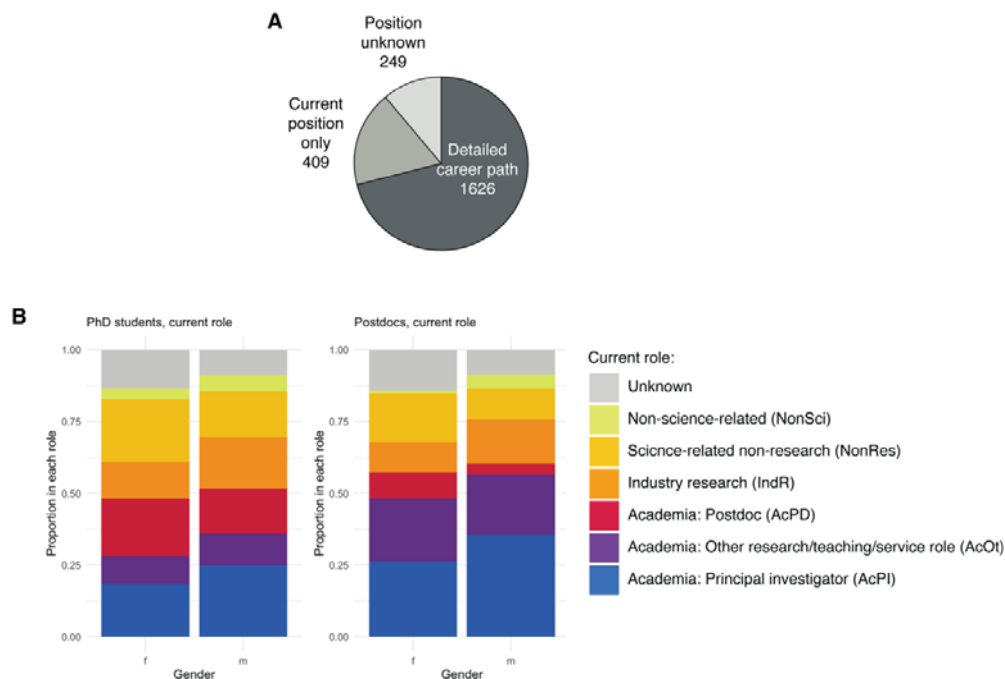

**Figure 1: Career outcomes for EMBL PhD and postdoc alumni**

(A) Pie chart showing data completeness for the 2284 early career researchers (ECRs) included in this study. Detailed career path indicates alumni for whom we were able to reconstruct a career path from EMBL to their current role with a maximum of two 1-year CV gaps, current position only indicates that we were not able to construct a complete career path but were able to identify their current position, and position unknown indicates that we were not able to identify their current role. (B) Current role by gender for former PhD students (left, n=969 [415 female, 554 male]) and postdocs (right, n=1315 [492 female, 823 male]).

1  
2  
3  
4  
5  
6  
7

### Time-resolved analysis of career outcomes confirms a changing career landscape

For further analysis, alumni were split into three 8-year cohorts. Some demographic differences were seen between cohorts including, at the PhD-level, a higher percentage of female ECRs for more recent cohorts. More recent cohorts were also larger (Table 2).

| Completion years       | PhD cohorts |           |           | Postdoc cohorts |           |           |
|------------------------|-------------|-----------|-----------|-----------------|-----------|-----------|
|                        | 1997-2004   | 2005-2012 | 2013-2020 | 1997-2004       | 2005-2012 | 2013-2020 |
| n=                     | 256         | 341       | 372       | 369             | 422       | 524       |
| % detailed career path | 69.9%       | 79.5%     | 76.6%     | 59.6%           | 61.1%     | 78.8%     |
| % female               | 33.2%       | 46.0%     | 46.5%     | 36.9%           | 35.3%     | 39.5%     |

**Table 2: Overview of PhD and postdoc cohorts**

8  
9  
10  
11  
12  
13  
14  
15  
16  
17  
18  
19

When comparing career outcomes of those with detailed career paths, differences in career outcomes by cohort at equivalent time-points after EMBL are evident (Supplementary Figure 2). For example, the proportion of alumni in PI roles 5-years after EMBL was markedly lower for PhD students and postdocs from the 2005-2012 and 2013-2020 cohorts than the 1997-2004 cohort (Figure 2A). Other smaller changes were also observed in the less well-represented career areas.

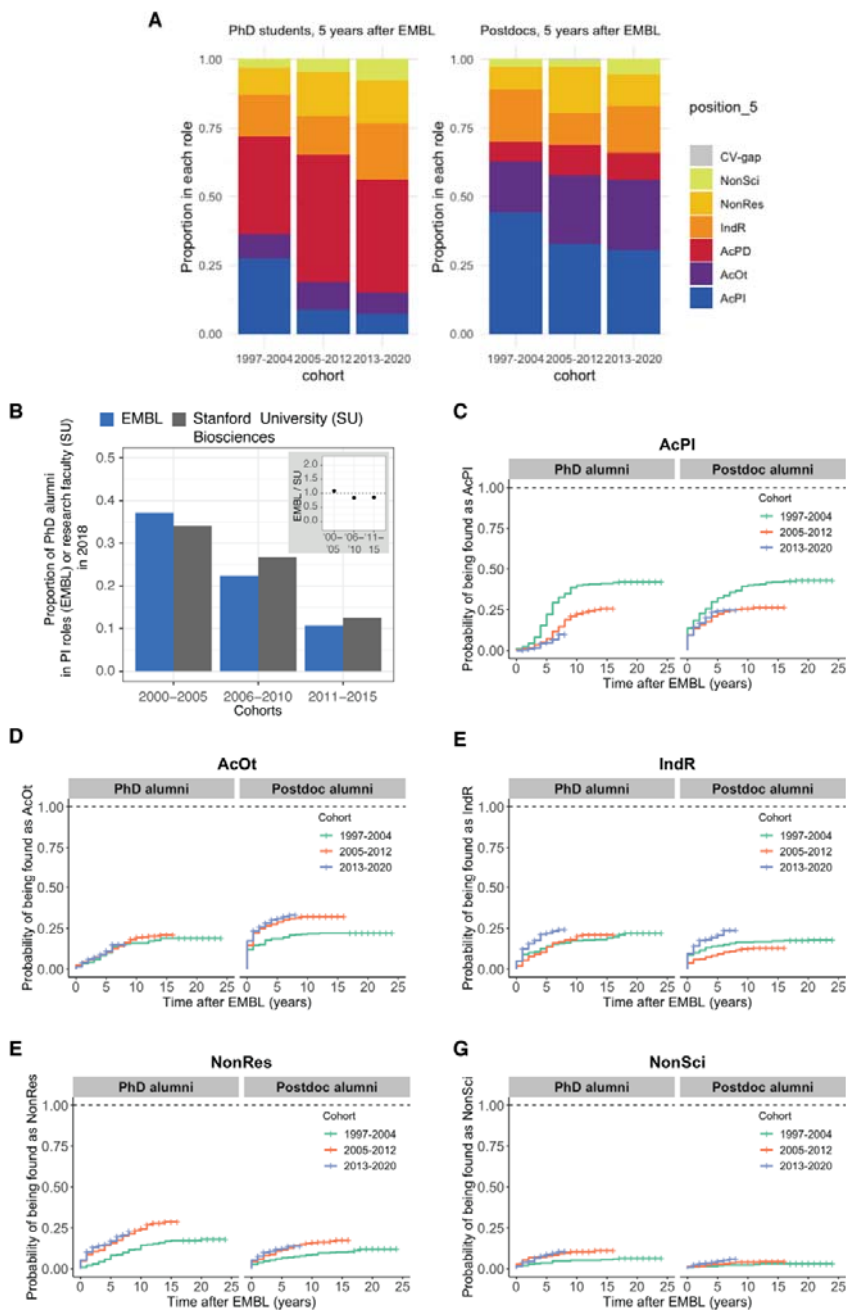

1 **Figure 2: Changes in career outcomes for more recent cohorts (A)** Position 5-years after EMBL for PhD students  
 2 (left, n=617) and postdocs (right, n=686) for whom we have a complete CV and who left EMBL 5-years or more ago, by  
 3 role classification. **(B)** Column charts showing the proportion of EMBL PhD alumni who were found as principal  
 4 investigators compared to the publicly available cohort-based data from Stanford University for research-focused faculty  
 5 (64). Detailed information about the comparison group can be found in Supplementary Table 5. **(C)** Kaplan-Meier plots  
 6 showing the estimated probability of an individual being found as a PI with time by PhD cohort (left) or Postdoc cohort  
 7 (right). **(D-G)** as C but for academic research / service / teaching positions (AcOt), Industry Research positions (IndR),  
 8 non-research science-related positions (NonRes) and non-science-related professions (NonSci).

9

10

1 **The percentage of EMBL alumni becoming PIs is similar to data released by North American**  
2 **institutions for both older and more recent cohorts**

3 To assess whether the changes in career outcomes are EMBL-specific, we compared our data with  
4 cohort-based data released by other institutions. We note that there are several limitations in  
5 comparing absolute career outcomes between individual studies. Most critically, individual studies  
6 often use different data collection methods and role classifications. Furthermore, career outcomes  
7 are influenced by the broader scientific ecosystem and the subject focuses of the institution's  
8 departments, which may attract ECRs with dissimilar career motivations. Nevertheless, comparing  
9 the outcomes with multiple institutions allows us to interrogate whether the changes we observe for  
10 the most frequent, well-defined and linear career path, the PhD-postdoc-PI track, reflect a general  
11 trend.

12 For example, EMBL has strong scientific overlap with Stanford University bioscience departments.  
13 Stanford has reported that 34% of its 2000-2005 bioscience PhD alumni and 13% of its 2011-2015  
14 bioscience PhD alumni were in research-focussed faculty roles in 2018(45). The equivalent data for  
15 EMBL is similar - with 37% of its 2000-2005 alumni and 11% of its 2011-2015 PhD alumni known  
16 to be in PI roles in 2018 (Figure 2B / Supplementary Table 4). Supplementary Figure 3 contains  
17 further examples of other programmes with high overlap of scientific areas. Generally, EMBL and  
18 the other institutes have a similar proportion of alumni entering PI roles for comparable cohorts.  
19 This is consistent with our hypothesis that the differences between cohorts are not EMBL-specific,  
20 and reflect a wide-spread change in the number of PhDs and postdocs relative to available PI  
21 positions.

22 We did not analyse the data for non-PI roles, as smaller numbers of individuals entering these roles  
23 make it difficult to identify real trends. Additionally, for postdoc career outcomes, only a small  
24 number of institutions have released detailed data on the destinations of recent alumni and we are  
25 not aware of any long-term cohort-based data.

26 **While most EMBL ECRs remain in science-related professions, the rate at which they become**  
27 **PIs has decreased with time**

28 To estimate the probability of alumni from different cohorts entering each type of role each year  
29 after completing an EMBL PhD or postdoc, we used a statistical regression method, the Cox  
30 proportional hazards model. This model is commonly used to model time-to-event distributions from  
31 observational data with censoring (i.e., when not all study subjects are monitored until the event  
32 occurs, or the event never occurs for some of the subjects). In brief, we fitted the data to a univariate  
33 Cox proportional hazards model to calculate hazard ratios, which represent the relative chance of the  
34 event considered (here: entering a specific type of role) occurring in each cohort with respect to the  
35 oldest cohort. We also calculated Kaplan–Meier estimators, which estimate the probability of the  
36 event (entering a specific type of role) at different time points.

37  
38 For entry of both PhD and postdoc alumni into PI roles, we observe hazard ratios of less than one in  
39 the Cox models when comparing the newer cohorts with the oldest cohort (Supplementary Table 5),  
40 indicating that the chances of becoming a PI have become lower for the newer cohorts. The Kaplan–  
41 Meier curves (Figure 2C) illustrate lower percentages of PIs among alumni from the most recent  
42 cohorts compared to the oldest cohort at equivalent time points after completing their EMBL PhD or  
43 postdoc. Nevertheless, PI roles remained the most common type of outcome observed for EMBL  
44 PhD and postdoc alumni from the 2005-2012 cohort (26.4% and 29.1% found in this career in  
45 2021), and the most recent cohort of alumni appear on a similar trajectory.

46 For postdoc alumni, our Cox models suggest that an increased proportion of the 2005-2012 and  
47 2013-2020 cohorts entered non-PI academic roles compared to the 1997-2004 cohort (Figure 2D).  
48 However, for PhD alumni the rate of entry into non-PI academic roles was similar for all three  
49 cohorts.

1 For both PhD and postdoc alumni, we observed a statistically significant increased probability of  
2 entering research roles in industry for the most recent (2013-2020) cohort compared to alumni from  
3 1997-2012 (Figure 2E, Supplementary Table 5). We also saw an increase in numbers entering non-  
4 research science-related and non-science-related roles for the 2005-2012 and 2013-2020 cohort  
5 compared to 1997-2004 (Figure 2F-G), although this proportion entering non-science-related roles  
6 remained small in comparison to other types of roles.

### 7 **A small increase in time between PhD conferral year and first PI position is observed**

8 The increased percentage of ECRs entering non-PI careers may fully explain the change in career  
9 destinations we observe. However, an increase in total postdoc length could also contribute to the  
10 reduced percentage of PIs we observe when comparing career destinations at specific time points  
11 after an ECR's PhD defence. We therefore asked whether an increased duration between PhD and  
12 first PI role was observed in our data. In order to fairly compare alumni from different cohorts, we  
13 included only alumni for whom we had a detailed career path, who had defended their PhD at least  
14 nine-years ago and who had become a PI within nine years of defending their PhD. The nine-year  
15 cut-off was chosen as this was the time interval between the last PhDs in the 2005-2012 cohort and  
16 the execution of this study; moreover, for PhD alumni from the oldest cohort (defence years 1997-  
17 2004), 92% (89/97) of those who became PIs had started this role within nine years of receiving  
18 their PhD, indicating that historically most alumni reached this career step within this time period.

19 From our PhD alumni, 157 alumni met our inclusion criteria for this analysis. On average, this group  
20 established their research group 5.6 calendar years (see Methods) after their PhD. There was a  
21 statistically significant change in time between PhD and first PI position of 0.8 calendar years  
22 between the 1997-2004 cohort (avg. 5.2 years) and 2005-2012 cohort (avg. 6.1 years) ( $p=0.015$ )  
23 (Supplementary Figure 4A). For postdoc alumni, whilst no statistically significant changes in the  
24 time from EMBL to PI role were observed (Supplementary Figure 4B, mean 2.5 years), there was an  
25 increase in PhD to PI length of 0.7 calendar years (5.3 calendar years for 1997-2004, 6.0 years for  
26 2005-2012; Supplementary Figure 4C). This may contribute to the reduced rate at which EMBL  
27 ECRs become PIs in the first years after EMBL, but is too small to explain the large differences in  
28 career trajectories more than 10-years after EMBL, when the number of alumni becoming PIs begins  
29 to plateau.

30

### 31 **Publication factors are highly predictive of early entry into a PI position**

32 Publication metrics have been linked to the likelihood of obtaining (46, 47) and succeeding (48) in a  
33 faculty position. In this study, alumni who became a PI had more favourable publication metrics  
34 from their EMBL work - for example, they published more papers, and papers that had a higher  
35 'Category Normalized Citation Impact' (indicating higher numbers of citations compared to other  
36 publications in the same field and year; a CNCI of one indicates performance expected by the  
37 average paper in that field and year) (Figure 3A-B, Supplementary Table 6).

38

39 To understand the potential contribution of an ECR's publication record as well as other factors such  
40 as cohort, gender, nationality, and seniority of the supervising PI, we fitted multivariate Cox models  
41 to the data including these factors as potential predictors for entry into each type of role. We  
42 included a range of metrics in our analysis – including journal impact factor, which has been shown  
43 to statistically correlate with becoming a PI in some studies (46) and continues to be used by some  
44 institutions in research evaluation (49). We, however, wish to note that EMBL is a signatory of the  
45 San Francisco Declaration on Research Assessment (DORA), and does not condone the use of  
46 journal impact factors for the evaluation of scientists' work, nor use them in its hiring or evaluation  
47 decisions.

48

49

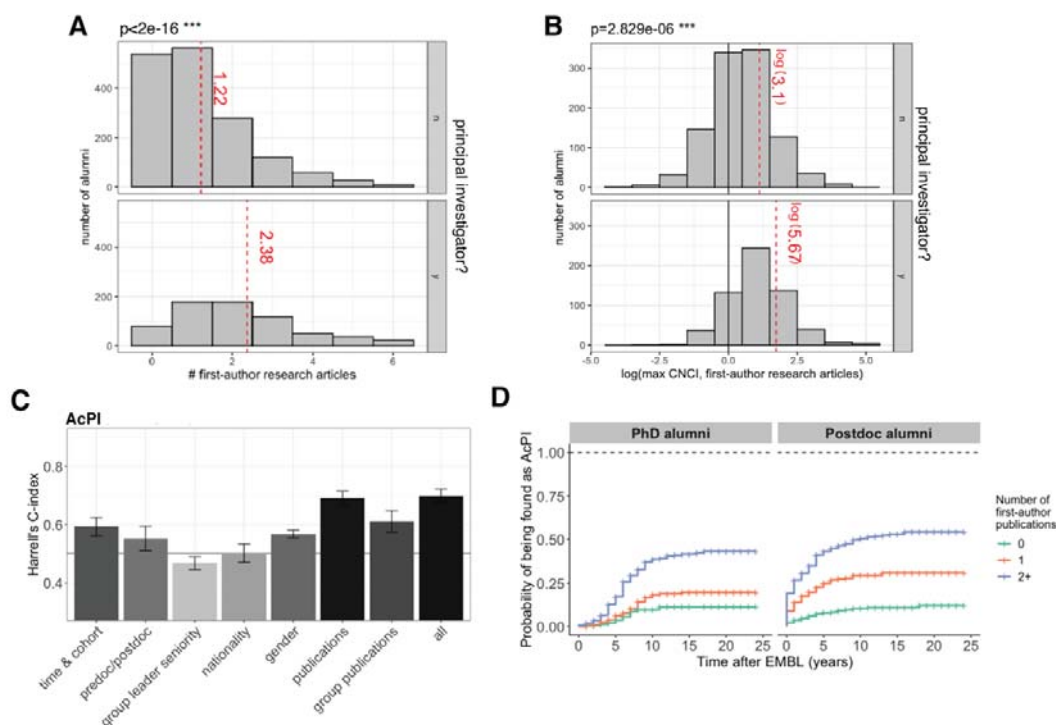

1

2 **Figure 3: Publication factors are highly correlated with entry into PI positions**

3 (A) Histograms of the number of first author EMBL publications per ECR ( $n=2284$ ) for alumni who have not (yet)  
4 become a PI (PI) (top) and those who became a PI (bottom). The number of publications includes only those using an  
5 EMBL affiliation. For clearer visualization and to ensure data protection for alumni with outlying numbers of  
6 publications, the x-axis (# of first-author research articles) is truncated at the 97.5<sup>th</sup> percentile. The mean for each group  
7 (including outliers) is shown as a red dashed line; the means were compared using a Welch's t-test. (B) Histograms of the  
8 natural logarithm of the highest category normalized citation of first author EMBL publications per ECR ( $n=1656$  ECRs  
9 publishing at least one first author paper linked to EMBL and with a CNCI value in Clarivate InCites' database) for  
10 alumni who have not (yet) become a PI (top) and those who became a PI (bottom). The log of the mean CNCI for each  
11 group is shown as a red dashed line. The distributions were compared using Welch's t-tests. A CNCI value of 1 (plotted  
12 here at  $\log(1)=0$ ) indicates that the publication's citations are equal to those expected for the 'average' publication in  
13 the same research category/categories and year. (C) Harrell's C-Index for models with different sets of covariates for  
14 predicting entry into PI positions. A value of 0.5 corresponds to the baseline, i.e., predictive value no better than  
15 guessing. A value of above 0.5 indicates that this model has a predictive power, with a value of 1 indicating complete  
16 concordance between predicted and observed order to outcome (e.g. entry into a PI position). Values are based on 10-  
17 fold cross-validation using a Cox model with ridge penalty. Bars denote the mean across folds and error bars denote the  
18 95% confidence intervals (D) Kaplan Meier-curves for probability of becoming PI stratified by number of  
19 first-author publications from research completed at EMBL for PhD and postdoc alumni.

20

21 To evaluate a model's predictive power, we used the cross-validated Harrell's C-index. The C-index  
22 measures a model's predictive power as the average agreement across all pairs of individuals  
23 between observed and predicted temporal order of the outcome (for example, becoming a PI). A C-  
24 index of 1 indicates complete concordance between observed and predicted order, and 0.5 is the  
25 baseline that would be achieved by guessing alone. Prediction is clearly limited by the fact that we  
26 could not explicitly encode some covariates that are certain to play an important role in career  
27 outcomes, such as career preferences and relevant skills. Nevertheless, the C-index for models  
28 containing all data were between 0.61 (entry to Industry Research) and 0.70 (entry into PI roles).  
29

30

31 Consistent with previous studies, we found that statistics related to the ECR's own publications were  
32 highly predictive for entry into a PI role: a model containing only the publication statistics performs  
almost as well as the complete model, reaching a C-index of 0.69 (Figure 3C). Consistent with this,



1 univariate Cox models also suggest that - for example - postdocs with one or more first-author  
 2 publications from their EMBL work are 3.2 or 6.6 times more likely to become PIs than their  
 3 colleagues with no first-author publication (Figure 3D, Supplementary Table 7). Group publications  
 4 (the aggregated publication statistics for all ECRs who were trained within the same research group),  
 5 cohort/time, gender and type of alumnus (PhD/postdoc), were also predictive for entry into a PI role,  
 6 with C-indexes of 0.61, 0.59, 0.57 and 0.55, respectively. Models containing only nationality or  
 7 group leader seniority were not predictive.  
 8

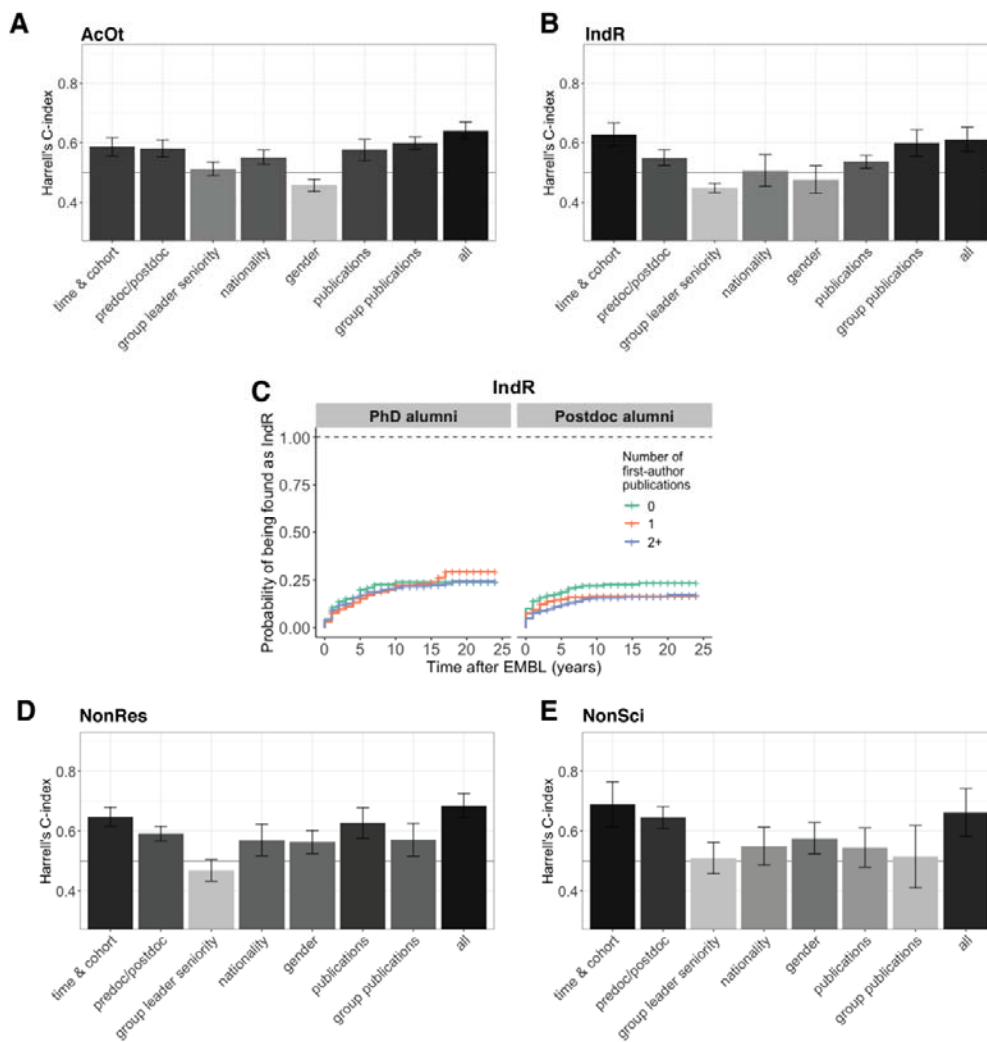

9  
 10 **Figure 4: Time-related factors and group publications are most predictive for non-academic career areas and**  
 11 **AcOt positions respectively.** (A-B) Harrell's C-Index for models sets with different sets of factors for entry into  
 12 academic research / service / teaching positions (AcOt) (A) and Industry Research positions (IndR)(B). A value of 0.5 is  
 13 the baseline model, i.e. pure guessing. A value of above 0.5 indicates that this model has a predictive power, with a value  
 14 of 1 indicating complete concordance between predicted and observed order to outcome (e.g. entry into a PI position).  
 15 Values are based on 10-fold cross-validation using a Cox model with ridge penalty. Bars denote the mean across folds  
 16 and error bars denote the 95% confidence intervals (C) Kaplan Meier-curves for probability of having entered an  
 17 Industry Research (IndR) role stratified by number of first-author publications from research completed at EMBL for  
 18 PhD and postdoc alumni (D-E) As A-B but for non-research science-related positions (NonRes) and non-science-related  
 19 professions (NonSci).

20 Publication statistics for the ECR's own publications were a weaker predictor of entry into non-PI  
 21 roles compared to PI roles (Figure 4). For example, for industry research a model containing  
 22 statistics for the ECRs' publications had a C-index of 0.54, compared to 0.61 for the complete model  
 23 (Figure 4B). In univariate Cox models, there were no differences in likelihood of an EMBL PhD

1 with 0, 1 or 2+ publications entering an Industry Research position (4C, Supplementary Table 7).  
2 Alumni who published more first author articles were, however, less likely to be found in non-  
3 research and non-science roles (Supplementary Figure 5, Supplementary Table 7). Average  
4 publication factors for those who enter each type of non-PI role are shown in Supplementary Tables  
5 8-11.

6  
7 For academic research, service and teaching positions, the factors that were most predictive were  
8 those related to the publications of all ECRs in the research group the fellow was trained in (Figure  
9 4A). It is unclear why this might be, but we speculate that this could reflect publication  
10 characteristics specific to certain fields that have a high number of staff positions, or other factors  
11 such as the scientific reputation, breadth or collaborative nature of the research group and its  
12 supervisor. The group's publications were also predictive for other research and science-related  
13 career areas.

14  
15 Time-related factors (i.e. cohort, PhD award year and EMBL contract start/ end years) were the  
16 strongest prediction factors for non-academic career categories (industry research, non-research  
17 science-related and non-science related professions, Figure 4B-D).

### 18 19 **More collaborative publications**

20 Previous reports suggest that more recent biology publications have increased amounts of data and  
21 more authors (40, 50); a corresponding decrease in the number of first author publications per PhD  
22 student has also been reported. For research articles linked to ECRs in this study, the average  
23 number of authors per research article has more than doubled between 1995 and 2020 (Figure 5A).  
24 No statistically significant difference was found for the number of research articles per ECR  
25 between cohorts (Figure 5B, average 3.6 per ECR); however, there was a difference in the number of  
26 first author research articles between cohorts. ECRs from the more recent cohorts published fewer  
27 first-author publications (Figure 5C, Supplementary Table 12).

28  
29 Data from Clarivate Analytics InCites databases suggest that increasing collaboration may contribute  
30 to the increasing number of authors: 79% of EMBL's publications in 2020 involved international  
31 collaboration, compared to 47% in 1995(51). More recent research articles with ECR authors from  
32 EMBL (Figure 5D) also had higher 'Category Normalised Citation Impact' values.

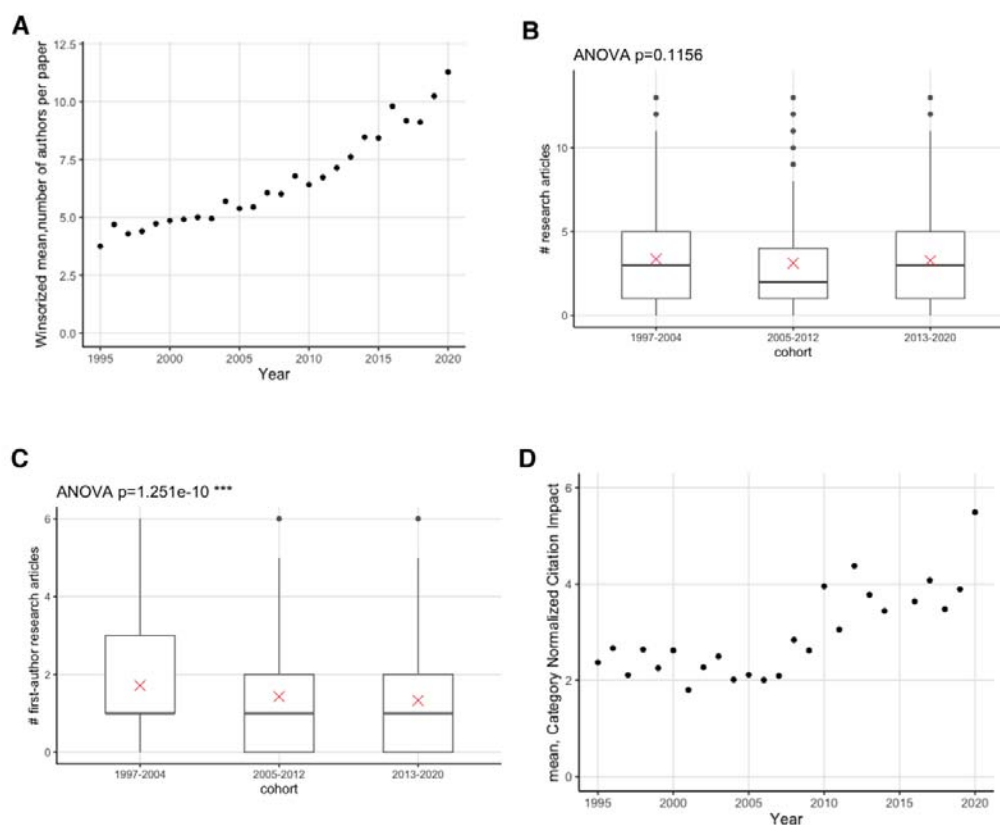

1  
2  
3  
4  
5  
6  
7  
8  
9  
10  
11  
12

**Figure 5: Publications are increasingly collaborative**

(A) Winsorized mean of authors on EMBL research articles between 1995-2020. Only research articles from 1995-2020 that were assigned to EMBL in the Web of Science InCites database and had at least one author included in this study are shown (n=5413). (B) Boxplot showing the distribution of the number of research articles by cohort. The mean is indicated as a red cross. For clearer visualization and to ensure data protection for alumni with outlying numbers of publications, the y-axis of the graph is truncated at the 97.5 percentile. The p-value was generated using one-way analysis of variance (ANOVA) test of the full dataset (including outliers); the p-value excluding outliers is 0.26. (C) As B but including first author research articles only; the p-value excluding outliers is 6.5e-7. (D) Mean Category Normalized Citation Impact for research articles between 1995-2020 that were assigned to EMBL in the Web of Science InCites database and had at least one author who was included in this study (n=5413).

## 1 **Discussion**

2 Our time-resolved analysis of career outcomes indicates that, overall, ECRs in the life sciences have  
3 strong job prospects. The career landscape for ECRs has been changing over the last 25 years.  
4 Nevertheless, the vast majority of former ECRs continue to pursue careers that contribute to the  
5 research and innovation landscape, many in managerial and leadership positions.

6  
7 Limitations of our study include that its retrospective, observational design limits our ability to  
8 disentangle causation from correlation. The changes in career outcomes may, for example, also be  
9 influenced by a greater availability or awareness of non-PI career options. EMBL has held an annual  
10 career day highlighting non-academic career options since 2006, and many-ECRs actively decide for  
11 a career in the private sector, attracted by perceptions of higher pay, more stable contracts, faster  
12 impact, and/or better work-life balance. ECRs driven by an interest in specific technologies may also  
13 consider roles in research infrastructures and scientific services to be as or more attractive than PI  
14 roles. Additionally, we cannot exclude that other factors may also affect the differences we see  
15 between cohorts. For example, variations in the number of alumni entering academic roles in  
16 countries that offer later scientific independence may have a small effect on outcome data.

17  
18 To overcome the limitations of this study and better investigate multifactorial and complex issues  
19 such as the gender differences in career outcomes, future studies should include large-scale mixed-  
20 method longitudinal studies that better record pre-existing career motivations, skills development,  
21 and other factors. Multi-institutional studies using consistent data collection methods and a robust  
22 classification of roles would also provide a fuller picture of workforce trends.

## 23 **Addressing ECR career challenges**

24 ECRs make important contributions to research and develop skills that continue to make them highly  
25 employable in academia, industry and other sectors. Nevertheless, some challenges are associated  
26 with the diversified career landscape and increase in large-scale projects.

27  
28  
29 Many ECRs are employed for long time-periods on short-term contracts funded by project-based  
30 grants (49) and surveys suggest that ECRs are concerned about career progression (24-28). This may  
31 influence high levels of poor mental health amongst ECRs (21, 23). To help alleviate current ECRs'  
32 career concerns and ensure that they can adapt to any further changes in the career landscape – for  
33 example, as the result of economic impacts from the corona virus pandemic (52) - it is essential that  
34 ECRs are provided with opportunities to reflect on their strengths, understand the wide variety of  
35 valuable career options available to them, and develop skills that advance their research projects and  
36 employability in their preferred career areas. Efficient and effective support requires input from  
37 different stakeholders - including institutions, supervisors, funders, policymakers, and employers of  
38 former ECRs - and the engagement of ECRs themselves. At EMBL, a career service was launched in  
39 2019 for all EMBL PhD students and postdocs, building on a successful EC-funded pilot project. In  
40 addition to ensuring that career development support is available for all ECRs, policymakers may  
41 need to reassess the sustainability of academic career paths, and review the proportion of funding  
42 allocated to project-based grants compared to mechanisms that can support PI and non-PI positions  
43 with longer-term stability. Providing career development support and more career stability will also  
44 support equality, diversity and inclusion in science.

45  
46 Publication factors are highly predictive of entry into PI careers. For ECRs aiming for a career as a  
47 PI, one challenge is balancing the quantity and subjective quality of publications. The observed trend  
48 to fewer first author papers likely reflects a global trend towards papers that have more authors,  
49 including more international collaborators, as well as EMBL's focus on ambitious interdisciplinary  
50 approaches. Ambitious interdisciplinary projects provide unrivalled opportunities to develop high-  
51 performance behaviours including team-work, leadership and creativity. They also allow researchers  
52 to tackle challenging biological questions from new angles and deliver publications that significantly  
53 advance the field; such publications are seen very positively by academic hiring committees (53-55).

1 However, more complex projects require coordinated input from a large group of co-authors, and  
2 may have longer project timelines. Supervisors and ECRs should discuss the potential impact and  
3 challenges associated with an ECR's project, and what can be done to reduce risks.

4  
5 Research assessment and availability of funding plays an important role in determining funding and  
6 career prospects of an academic. Therefore, it is also vital that factors that may affect apparent  
7 productivity of ECRs, such as involvement in large-scale projects, career breaks, or time spent on  
8 teaching and service, are considered in research assessment. The impact of the coronavirus pandemic  
9 on research productivity of researchers with caregiving responsibilities makes these actions  
10 imperative (56-58). Initiatives such as the San Francisco Declaration on Research Assessment  
11 (DORA) have been advocating for an increased focus on good practice in research assessment, and  
12 many funders have reviewed their practices. Cancer Research UK, for example, now asks applicants  
13 to its grants to describe three to five research achievements, which can include non-publication  
14 outputs (59). Other initiatives include more transparent author contribution information in  
15 publications (60, 61) and promotion of "FAIR" principles of data management (62). We also expect  
16 the increasing use of preprints (40, 63) to have a positive effect on the careers of ECRs involved in  
17 ambitious projects with longer publication time-scales.

## 18 19 **Conclusions**

20 Our data highlight the many ways that early career researchers contribute to the research and  
21 innovation landscape, and suggest that early career life scientists continue to enter leadership roles in  
22 academia, industry and other sectors. ECR training therefore continues to be a valuable investment  
23 that creates a highly qualified workforce with strong job prospects.

24  
25 Nevertheless, a number of challenges exist for ECRs in their careers, particularly increasing  
26 competition for mid-career research leadership roles in academia. These challenges may also  
27 increase in the coming years due to the impacts of the coronavirus pandemic. Adequate support and  
28 policies to address these challenges are therefore urgently needed. Continued monitoring of career  
29 outcomes will be essential for policymakers deciding how best to adapt funding and training  
30 programmes to support sustainable career paths in the life sciences, and to enable ECRs to make  
31 informed decisions about their own career development.

## 32 33 **Methods**

34 **Data collection & analysis** The study includes individuals who graduated from the EMBL  
35 International PhD Programme (n=969) between 1997 and 2020 or who left the EMBL postdoc  
36 programme between 1997 and 2020 after spending at least one year as an EMBL postdoctoral fellow  
37 (n=1315). Each person is included only once in the study: where a PhD student remained at EMBL  
38 for a bridging or longer postdoc, they were included as PhD alumni only, with the postdoc position  
39 listed as a career outcome.

40 For each alumnus or alumna, we retrieved demographic information from our internal records and  
41 identified publicly available information about each person's career path (see supplementary  
42 methods). Where possible, this information was used to reconstruct a detailed career path for each  
43 ECR. An individual was classified as having a "detailed career path" if an online CV or biosketch  
44 was found that accounted for their time since EMBL excluding a maximum of two 1-calendar-year  
45 career breaks (which may, for example, reflect undisclosed sabbaticals or parental leave). Each  
46 position was classified using a detailed taxonomy, based on a published schema (42), and given a  
47 broad overall classification (see Supplementary Methods). The country of the position was also  
48 recorded. For the most recent position, we noted whether the job title was indicative of a senior or  
49 management level role (included "VP",  
50 "chief", "cso", "cto", "ceo", "head", "principal", "president", "manager", "leader", "senior"), or if they  
51 appeared to be running a scientific service or core facility in academia.

1 We use calendar years for all outcome data - for example, for an ECR who left EMBL in 2012, the  
2 position one calendar year after EMBL would be the position held in 2013. If multiple positions  
3 were held in that year, we take the most recent position. We use calendar years, as the available  
4 online information often only provides the start and end year of a position (rather than exact date).

5 An EMBL publication record was also reconstituted for each person in the study. Each of their  
6 publications linked to EMBL in Clarivate Analytics' Web of Science and InCites databases in June  
7 2021 were recorded. The data included publication year and - for those indexed in InCites- crude  
8 metrics, such as category normalised citation impact and percentile in subject area (measures of  
9 citations) as well as journal impact factor. EMBL publications were assigned to individuals in the  
10 study based on matching name and publication year (see Supplementary Methods for full  
11 description). When an individual was the second author on a publication, we manually checked for  
12 declarations of co-first authorship. Aggregate publication statistics for ECRs with the same primary  
13 supervisor were also calculated.

14 The names and other demographic information that would allow easy identification of individuals in  
15 the case of a data breach were pseudonymised. A file with key data for analysis and visualisation in  
16 R was then generated. A description of this data table can be found in Supplementary Table 1, along  
17 with summary statistics.

18 **Statistical model** A Cox proportional hazards regression model was fitted to the data in order to  
19 predict time-to-event probabilities for each type of career outcome based on different covariates  
20 including cohort, publication variables and gender. Multivariate Cox models were fitted using a  
21 ridge penalty with penalty parameter chosen by 10-fold cross-validation. Harrell's C-index was  
22 calculated for each fit in an outer cross-validation scheme for validation and analysis of different  
23 models, with 10-fold cross-validation.

24 **Data availability, and data protection** The data were collated for the provision of statistics, and  
25 are stored in a manner compliant with EMBL's internal policy on data protection  
26 (<https://www.embl.org/documents/document/internal-policy-no-68-on-general-data-protection/>). The  
27 nature of the data precludes sufficient anonymisation to provide a public data-release. Summary  
28 statistics for the data table used to generate the figures can be found in Supplementary Table 1.  
29

30 **Code availability** Rmarkdown documentation of the analysis and figures (except 1A, created in  
31 adobe illustrator) can be found at: <https://www.huber.embl.de/users/jlu/EMBLcareer/analysis.html>

32 Source code is available at: <https://github.com/Huber-group-EMBL/EMBL-Career-Analysis>

### 33 **Acknowledgements**

34 We would like to thank Monika Lachner and Anne Ephrussi for their critical reading of the  
35 manuscript and strong support of this project. We also acknowledge the instrumental support of  
36 EMBL's Alumni Relations, HR, SAP, Library, International PhD Programme and Postdoc  
37 Programme teams providing the initial information that allowed this study to be completed. Finally,  
38 we thank Edith Heard, Brenda Stride, Jana Watson-Kapps (FMI), and EMBL's Directorate, SAC,  
39 SSMAC and Council for discussion.  
40

41 Rachel Coulthard-Graf is employed by EMBL's Interdisciplinary Postdoc Programme, which has  
42 received funding from the European Union's Horizon 2020 research and innovation programme  
43 under Marie Skłodowska-Curie grant agreements 664726 (2016-2020) and 847543 (2019-present).

### 44 **Author contributions**

45 Junyan Lu: Methodology; Formal analysis; Data Curation; Writing – review & editing;  
46 Visualization. Britta Velten: Methodology; Formal analysis; Data Curation; Writing – review &  
47 editing; Visualization. Bernd Klaus: Methodology; Formal analysis; Data Curation; Writing –

- 1 review & editing; Visualization. Mauricio Ramm: Methodology; Investigation. Wolfgang Huber:
- 2 Methodology; Writing – review & editing; Supervision. Rachel Coulthard-Graf: Conceptualization;
- 3 Methodology; Formal analysis; Investigation; Data curation; Writing – original draft preparation;
- 4 Writing – review & editing; Visualization.

## References

1. National Science Board. 2018. Science and Engineering Indicators 2018. NSB-2018-1. (Table 3-16 ): National Science Foundation; 2018 [updated 8/9/2021. Available from: <https://www.nsf.gov/statistics/2018/nsb20181/assets/901/tables/tt03-16.pdf>.
2. Cyranoski D, Gilbert N, Ledford H, Nayar A, Yahia M. Education: The PhD factory. *Nature*. 2011;472(7343):276-9.
3. Ghaffarzadegan N, Hawley J, Larson R, Xue Y. A Note on PhD Population Growth in Biomedical Sciences. *Syst Res Behav Sci*. 2015;23(3):402-5.
4. Kahn S, Ginther DK. The impact of postdoctoral training on early careers in biomedicine. *Nat Biotechnol*. 2017;35(1):90-4.
5. Powell K. The future of the postdoc. *Nature*. 2015 04/09.
6. Schillebeeckx M, Maricque B, Lewis C. The missing piece to changing the university culture. *Nat Biotechnol*. 2013;31(10):938-41.
7. Wadman M. A workforce out of balance. *Nature*. 2012;486(7403):304.
8. Zerhouni EA. Research funding. NIH in the post-doubling era: realities and strategies. *Science*. 2006;314(5802):1088-90.
9. Graduation from tertiary education (ISCED 1997) by sex, level and field of education [hrst\_fl\_tegrad] [Internet]. Eurostat. [cited 30.08.19]. Available from: [http://appsso.eurostat.ec.europa.eu/nui/show.do?dataset=hrst\\_fl\\_tegrad&lang=en](http://appsso.eurostat.ec.europa.eu/nui/show.do?dataset=hrst_fl_tegrad&lang=en).
10. Teachers (ISCED 0-4) and academic staff (ISCED 5-6) by employment status and sex [educ\_pers1t] [Internet]. Eurostat. [cited 30.08.19]. Available from: [https://appsso.eurostat.ec.europa.eu/nui/show.do?dataset=educ\\_pers1t&lang=en](https://appsso.eurostat.ec.europa.eu/nui/show.do?dataset=educ_pers1t&lang=en).
11. Izsak K, Markianidou P, Lukach R, Wastyn A. Impact of the Crisis on Research and Innovation Policies, Study for the European Commission DG Research by Technopolis Group Belgium and Idea Consult. 2013.
12. Pellens M, Peters B, Hud M, Rammer C, Licht G. Public Investment in R&D in Reaction to Economic Crises – A Longitudinal Study for OECD Countries.
13. Hubert M, Louvel S. Project-Based Funding: What Are the Effects on the Work of Researchers? *Mouvements*. 2012;71(3):13-24.
14. Lepori B, van den Besselaar P, Dinges M, Poti B, Reale E, Slipersæter S, et al. Comparing the evolution of national research policies: What patterns of change? *Science and Public Policy*. 2007;34(6):372-88.
15. Zacharewicz KJT. Research Performance Based Funding Systems: a Comparative Assessment. 2017.
16. Fuhrmann CN, Halme DG, O'Sullivan PS, Lindstaedt B. Improving graduate education to support a branching career pipeline: recommendations based on a survey of doctoral students in the basic biomedical sciences. *CBE Life Sci Educ*. 2011;10(3):239-49.
17. Gibbs KD, McGready J, Griffin K. Career Development among American Biomedical Postdocs. *Cell Biology Education*. 2015;14(4):ar44-ar.
18. Lambert WM, Wells MT, Cipriano MF, Sneva JN, Morris JA, Golightly LM. Career choices of underrepresented and female postdocs in the biomedical sciences. *eLife*. 2020;9:e48774.
19. Roach M, Sauermann H. The Declining Interest in an Academic Career. *SSRN Electronic Journal*. 2017.
20. Sauermann H, Roach M. Science PhD career preferences: levels, changes, and advisor encouragement. *PLoS ONE*. 2012;7(5):e36307.
21. Evans TM, Bira L, Gastelum JB, Weiss LT, Vanderford NL. Evidence for a mental health crisis in graduate education. *Nat Biotechnol*. 2018;36(3):282-4.
22. Hayter CS, Parker MA. Factors that influence the transition of university postdocs to non-academic scientific careers: An exploratory study. *Research Policy*. 2019;48(3):556-70.
23. Levecque K, Anseel F, De Beuckelaer A, Van der Heyden J, Gisle L. Work organization and mental health problems in PhD students. *Research Policy*. 2017;46(4):868-79.
24. Woolston C. Uncertain prospects for postdoctoral researchers. *Nature*. 2020;588(7836):181-4.
25. Woolston C. Postdocs under pressure: 'Can I even do this any more?'. *Nature*. 2020;587(7835):689-92.
26. Woolston C. Postdoc survey reveals disenchantment with working life. *Nature*. 2020;587(7834):505-8.
27. Woolston C. PhDs: the tortuous truth. *Nature*. 2019;575(7782):403-6.
28. Woolston C. Graduate survey: A love-hurt relationship. *Nature*. 2017;550(7677):549-52.
29. Alberts B, Kirschner MW, Tilghman S, Varmus H. Rescuing US biomedical research from its systemic flaws. *Proc Natl Acad Sci USA*. 2014;111(16):5773-7.



30. Polka JK, Krukenberg KA, McDowell GS. A call for transparency in tracking student and postdoc career outcomes. *Mol Biol Cell*. 2015;26(8):1413-5.
31. Mathur A, Cano A, Kohl M, Muthunayake NS, Vaidyanathan P, Wood ME, et al. Visualization of gender, race, citizenship and academic performance in association with career outcomes of 15-year biomedical doctoral alumni at a public research university. *PLoS ONE*. 2018;13(5):e0197473.
32. Reithmeier R, O'Leary L, Zhu X, Dales C, Abdulkarim A, Aquil A, et al. The 10,000 PhDs project at the University of Toronto: Using employment outcome data to inform graduate education. *PLoS ONE*. 2019;14(1):e0209898.
33. Silva EA, Des Jarlais C, Lindstaedt B, Rotman E, Watkins ES. Tracking Career Outcomes for Postdoctoral Scholars: A Call to Action. *PLoS Biol*. 2016;14(5):e1002458.
34. Blank R, Daniels RJ, Gilliland G, Gutmann A, Hawgood S, Hrabowski FA, et al. A new data effort to inform career choices in biomedicine. *Science*. 2017;358(6369):1388-9.
35. Leysinger CH, Alexander; Peneoasu, Ana-Maria. Tracking the Careers of Doctorate Holders: EUA-CDE Thematic Peer Group Report. EUA Council for Doctoral Education; 2020.
36. Career Tracking of Doctorate Holders - Pilot Project Report. European Science Foundation; 2015 May 2015. Report No.: ISBN: 978-2-36873-013-3.
37. Katie Oldfield CR, Erica Garnett and Helen Rossiter. Bringing Research Careers into Focus: An MRC Review of Next Destinations. IFF Research Ltd for the Medical Research Council; 2015.
38. Karrierer i forskningen – Sammenhæng og fleksibilitet i forskeres karriereveje. Udgivet af Danmarks Forsknings- og Innovationspolitiske Råd; 2019 January 2019. Contract No.: ISBN: 978-87-92572-42-4.
39. Vermeulen N, Parker JN, Penders B. Understanding life together: a brief history of collaboration in biology. *Endeavour*. 2013;37(3):162-71.
40. Vale RD. Accelerating scientific publication in biology. *Proc Natl Acad Sci U S A*. 2015;112(44):13439-46.
41. Cordero RJB, de León-Rodríguez CM, Alvarado-Torres JK, Rodríguez AR, Casadevall A. Life Science's Average Publishable Unit (APU) Has Increased over the Past Two Decades. *PLoS ONE*. 2016;11(6):e0156983.
42. Stayart CA, Brandt PD, Brown AM, Dahl T, Layton RL, Petrie KA, et al. Applying inter-rater reliability to improve consistency in classifying PhD career outcomes. *F1000Res*. 2020;9:8.
43. Alper J. The pipeline is leaking women all the way along. *Science*. 1993;260(5106):409-11.
44. Martinez ED, Botos J, Dohoney KM, Geiman TM, Kolla SS, Olivera A, et al. Falling off the academic bandwagon. Women are more likely to quit at the postdoc to principal investigator transition. *EMBO reports*. 2007;8(11):977-81.
45. Stanford Biosciences: Alumni Career Outcomes by Cohort Stanford University [10/9/2021]. Available from: <https://biosciences.stanford.edu/prospective-students/alumni-career-outcomes-dashboard/alumni-career-outcomes-by-cohort/>.
46. van Dijk D, Manor O, Carey LB. Publication metrics and success on the academic job market. *Curr Biol*. 2014;24(11):R516-7.
47. Tregellas JR, Smucny J, Rojas DC, Legget KT. Predicting academic career outcomes by predoctoral publication record. *PeerJ*. 2018;6:e5707.
48. von Bartheld CS, Houmanfar R, Candido A. Prediction of junior faculty success in biomedical research: comparison of metrics and effects of mentoring programs. *PeerJ*. 2015;3(11):e1262.
49. McKiernan EC, Schimanski LA, Muñoz Nieves C, Matthias L, Niles MT, Alperin JP. Use of the Journal Impact Factor in academic review, promotion, and tenure evaluations. *eLife*. 2019;8:e47338.
50. Fanelli D, Larivière V. Researchers' Individual Publication Rate Has Not Increased in a Century. *PLoS ONE*. 2016;11(3):e0149504.
51. Institutional Profile - EMBL [Internet]. Clarivate Analytics [cited 27/8/2020]. Available from: <https://incites.clarivate.com/#/profile/organization/>.
52. Bodin M. Nature Careers News: Nature. 2020.
53. Hsu NS, Rezai-zadeh KP, Tennekoon MS, Korn SJ. Myths and facts about getting an academic faculty position in neuroscience. *Sci Adv*. 2021;7(35):eabj2604.
54. Clement L, Dorman JB, McGee R. The Academic Career Readiness Assessment: Clarifying Hiring and Training Expectations for Future Biomedical Life Sciences Faculty. *CBE—Life Sciences Education*. 2020;19(2):ar22.
55. Fernandes JD, Sarabipour S, Smith CT, Niemi NM, Jadavji NM, Kozik AJ, et al. A survey-based analysis of the academic job market. *eLife*. 2020;9:e54097.
56. Korbel JO, Stegle O. Effects of the COVID-19 pandemic on life scientists. *Genome Biology*. 2020;21(1):113.

57. Viglione G. Are women publishing less during the pandemic? Here's what the data say. *Nature*. 2020;581:365-6.
58. Andersen JP, Nielsen MW, Simone NL, Lewiss RE, Jaggi R. COVID-19 medical papers have fewer women first authors than expected. *eLife*. 2020;9:e58807.
59. Good Practices: San Francisco Declaration on Research Assessment Dora; [28/1/2022]. Available from: <https://sfdora.org/resource/cancer-research-uk-cruk/>.
60. McNutt MK, Bradford M, Drazen JM, Hanson B, Howard B, Jamieson KH, et al. Transparency in authors' contributions and responsibilities to promote integrity in scientific publication. *Proc Natl Acad Sci USA*. 2018;115(11):2557-60.
61. Berg J. Transparent author credit. *Science*. 2018;359(6379):961-.
62. Wilkinson MD, Dumontier M, Aalbersberg IJJ, Appleton G, Axton M, Baak A, et al. The FAIR Guiding Principles for scientific data management and stewardship. *Sci Data*. 2016;3:160018.
63. Kaiser J. Are preprints the future of biology? A survival guide for scientists. *Science*. 2017.
64. The Stanford PhD Alumni Employment Project: University of Stanford Institutional Research & Decision Support; [17/1/2020]. Available from: <http://web.stanford.edu/dept/pres-provost/irds/PhDAlumniEmployment>.
65. University of California San Francisco Graduate Division Programme Statistics: University of California San Francisco Graduate Division; [9/11/2021]. Available from: <https://graduate.ucsf.edu/program-statistics>.
66. University of Chicago BioScience Division Alumni Job Titles: University of Chicago; [20/8/2021]. Available from: [https://biosciences.uchicago.edu/sites/default/files/client-wysiwyg-uploads/2017%20BSD%20Alumni%20Job%20Functions\\_0.pdf](https://biosciences.uchicago.edu/sites/default/files/client-wysiwyg-uploads/2017%20BSD%20Alumni%20Job%20Functions_0.pdf)
67. Ph.D. Program Statistics - Rackham Rackham Graduate School, University of Michigan; [9/11/2018]. Available from: [https://secure.rackham.umich.edu/academic\\_information/program\\_statistics/doctoral/program.php](https://secure.rackham.umich.edu/academic_information/program_statistics/doctoral/program.php).
68. 10,000 PhDs Dashboard: University of Toronto School of Graduate Studies; [10/9/2021]. Available from: <https://www.sgs.utoronto.ca/about/10000-phds-project-overview/10kphds-dashboard/>.
